# Supplementary material
Source: Springer Nature journal article supplement (https://www.springermedizin.de/resource/supplementary/12887_2013_1095_MOESM1_ESM.pdf/9476450)

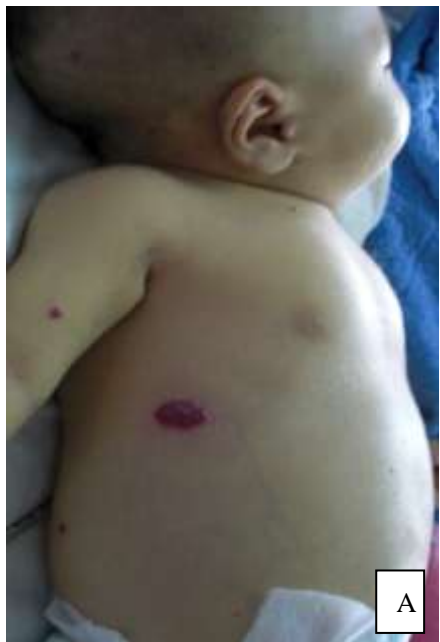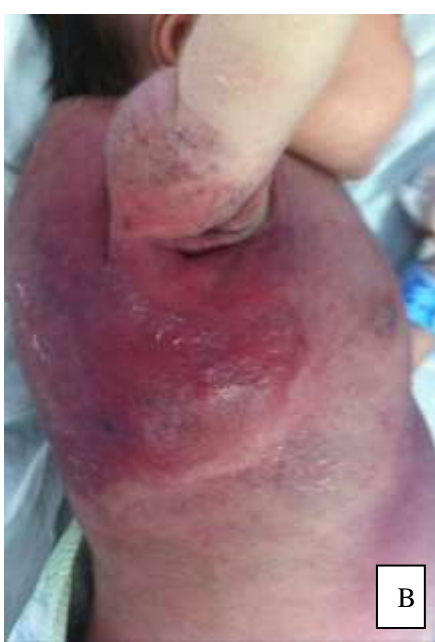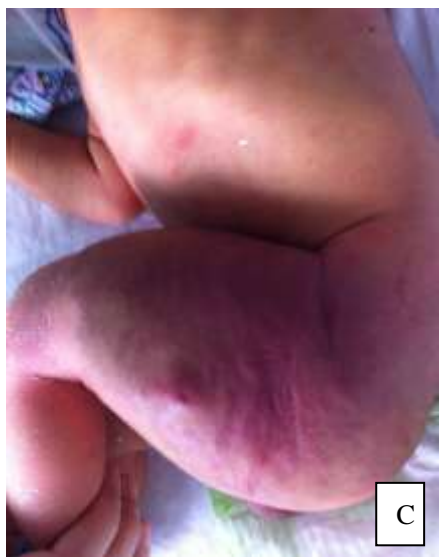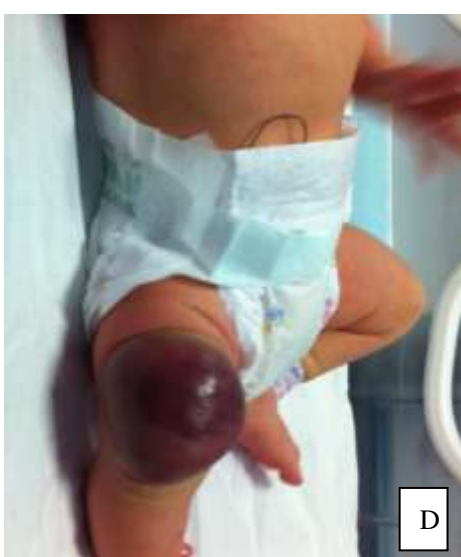

Supplement: MOESM1 [file 9476450]
